# Supplementary material
Source: PubMed Central journal article supplement (PMC3029166)
Supplement: supp_84_2_184__1.pdf [file supp_84_2_184__1.pdf]

## SUPPLEMENTAL INFORMATION

Additional information about water supply services provided by The Community Water Supply and Sanitation Program (CWSSP); data collection procedures, patterns of attrition among study participants, characteristics of sampled households, Figure S1, and Table S1 and Table S2 are including in the Supplemental Information.

Households served by the CWSSP do not contribute to the construction costs of the borewells, storage facilities, or distribution networks; these costs are covered by the municipal water and sanitation authority. Users are expected to cover recurrent costs such as electricity to power the borewell pumps. As such, tap users typically pay a per-jerrican (20 L) fee of US dollars (USD) \$0.03–0.04 or the equivalent

of USD \$1.50–2.00 per m<sup>3</sup> for the water that they obtain from the borewells.

## DATA COLLECTION

Field protocols for taking water and hand samples were developed in English and Kiswahili and tested in a pilot community. Laboratory protocols for analyzing field samples were prepared in English and Kiswahili. The field teams that carried out data collection were comprised of recent university graduates from Dar es Salaam who underwent an intensive 3-week training on use of the personal digital assistants (PDAs), effective interviewing techniques, and proper collection of water and hand-rinse samples. Laboratory technicians were trained in processing and analysis of samples as well as logging sample data into a project database.

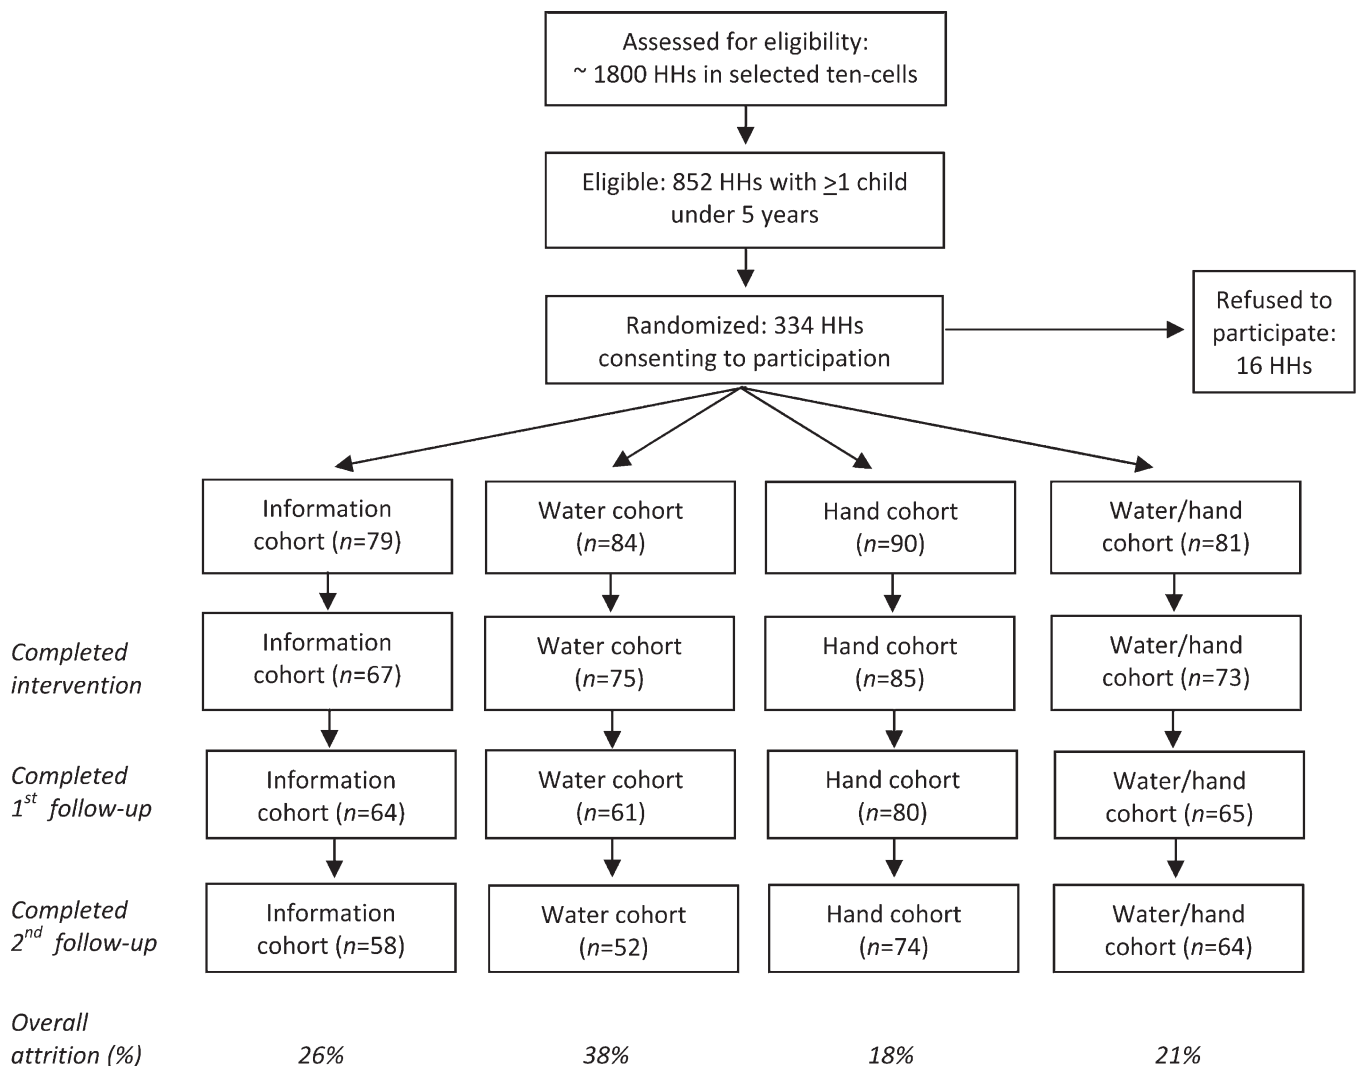

FIGURE S1. Study participant flowchart.

TABLE S1  
Baseline characteristics of sample households and respondents by cohort

|                                                                                  | Cohort 1: health information only (N = 58) | Cohort 2: hand tests only (N = 52) | Cohort 3: water tests only (N = 74) | Cohort 4: water and hand tests (N = 64) |
|----------------------------------------------------------------------------------|--------------------------------------------|------------------------------------|-------------------------------------|-----------------------------------------|
| Mean (SD) number of people in family                                             | 5.6 (2.2)                                  | 5.8 (2.6)                          | 5.2 (2.1)                           | 5.2 (2.5)                               |
| Mean (SD) number of families living in housing unit                              | 2.9 (2.4)                                  | 2.8 (2.4)                          | 3.1 (2.6)                           | 3.2 (2.8)                               |
| Percentage of homeowners                                                         | 63                                         | 57                                 | 62                                  | 57                                      |
| Percentage of homes with electricity service                                     | 42                                         | 57                                 | 50                                  | 50                                      |
| Percentage of families with a mobile phone                                       | 87                                         | 87                                 | 87                                  | 87                                      |
| Mean (SD) regular expenses per week (USD)                                        | 25.21 (12.1)                               | 23.78 (11.3)                       | 23.60 (10.0)                        | 25.20 (12.48)                           |
| Number of water sources used regularly                                           | 1.4 (0.6)                                  | 1.4 (0.6)                          | 1.5 (0.8)                           | 1.4 (0.6)                               |
| Percentage using own/neighbor's shallow well                                     | 54                                         | 48                                 | 58                                  | 47                                      |
| Percentage using a public tap                                                    | 14                                         | 15                                 | 12                                  | 17                                      |
| Percentage buying vended water                                                   | 15                                         | 17                                 | 11                                  | 5                                       |
| Percentage using private household toilet                                        | 100                                        | 100                                | 99                                  | 99                                      |
| Mean (SD) age of respondent (mother)                                             | 31.9 (9.8)                                 | 28.6 (7.0)                         | 31.1 (9.0)                          | 30.2 (8.4)                              |
| Percentage who can read and write                                                | 83                                         | 84                                 | 91                                  | 85                                      |
| Percentage who earn a wage                                                       | 22                                         | 13                                 | 18                                  | 18                                      |
| Percentage with no formal education                                              | 12                                         | 13                                 | 8                                   | 12                                      |
| Percentage with more than primary education                                      | 24                                         | 25                                 | 21                                  | 17                                      |
| Percentage with 1+ family member ill with GI symptoms in 2 days before interview | 10                                         | 11                                 | 5                                   | 9                                       |
| Percentage of Muslims                                                            | 34                                         | 47                                 | 58                                  | 47                                      |
| Percentage of Christians                                                         | 66                                         | 53                                 | 42                                  | 53                                      |

Note that sample sizes refer to number of respondents in each cohort at the close of the study (i.e., after attrition). SD = standard deviation; USD = US dollars; GI = gastrointestinal.

TABLE S2  
Ordinary least-squares regression of change in log mean *E. coli* contamination of stored water and hands between baseline and second follow-up survey

|                                                  | Mean (SD) value for full sample       | Model 1: change in stored water contamination (log cfu/100 mL) | Model 2: change in hand contamination (log cfu per two hands) |
|--------------------------------------------------|---------------------------------------|----------------------------------------------------------------|---------------------------------------------------------------|
| Intercept                                        | –                                     | 1.54 (0.26)                                                    | 2.45 (0.27)                                                   |
| Member of hand cohort (dummy)                    | 0.24 (0.43)                           | 0.10 (0.24)                                                    | –0.01 (0.19)                                                  |
| Member of water cohort (dummy)                   | 0.31 (0.46)                           | –0.11 (0.24)                                                   | 0.22 (0.17)                                                   |
| Member of hand/water cohort (dummy)              | 0.22 (0.42)                           | –0.09 (0.25)                                                   | 0.25 (0.18)                                                   |
| Received high water test result (dummy)          | 0.15 (0.36)                           | 0.34 (0.28)                                                    | –                                                             |
| Baseline <i>Escherichia coli</i> level (log cfu) | Water: 1.36 (0.98); hand: 3.20 (0.93) | –1.06* (0.10)                                                  | –0.83* (0.07)                                                 |
| Reported improved water storage (dummy)          | 0.26 (0.44)                           | 0.00 (0.18)                                                    | –                                                             |
| Reported increased water treatment (dummy)       | 0.26 (0.44)                           | 0.02 (0.19)                                                    | –                                                             |
| Reported increased handwashing frequency (dummy) | 0.24 (0.42)                           | 0.32 (0.20)                                                    | –0.09 (0.15)                                                  |
| Reported increased use of soap (dummy)           | 0.47 (0.50)                           | 0.09 (0.14)                                                    | –0.04 (0.13)                                                  |
| Completed education beyond primary level (dummy) | 0.22 (0.42)                           | –0.10 (0.19)                                                   | 0.22 (0.15)                                                   |
| Adjusted R <sup>2</sup>                          | –                                     | 0.44                                                           | 0.43                                                          |
| N                                                | –                                     | 154                                                            | 214                                                           |

Negative coefficients indicate reduction in mean contamination. SD = standard deviation; cfu = colony-forming units.

\*  $P \leq 0.01$ .
